# Supplementary material for: Drosha regulates adipogenesis by modulating miR-204/miR-15b in OP9 cells
Source: Research Square preprint supplement (doi:10.21203/rs.3.rs-7599201/v1), 2025-10-29
Supplement: Supplementary file 1 [file c9d94bf8d66052df0ff71bff.pdf]

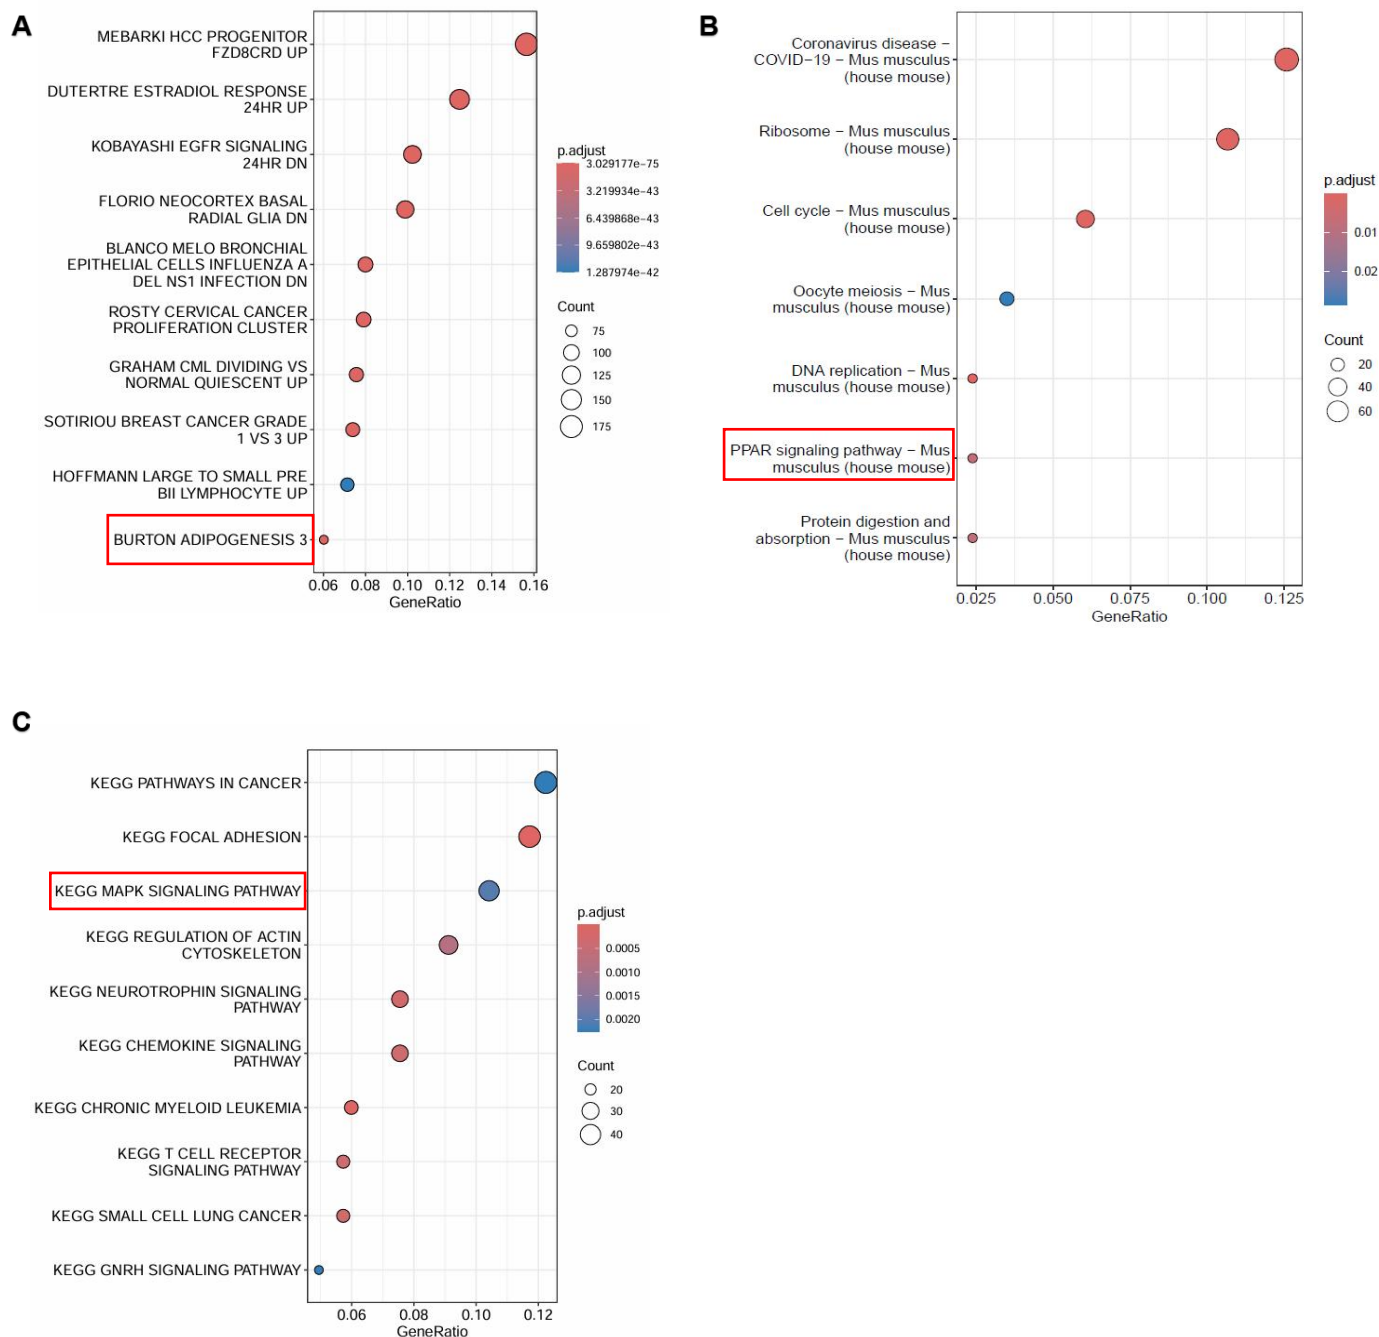

**Supplementary Figure 1. Analysis of transcript data from Dicer1 KO OP9 cells. A** MSigDB Chemical and genetic perturbations pathway enrichment analysis of downregulated DEGs in Dicer1 KO. **B** Wiki pathway enrichment analysis of upregulated DEGs in Dicer1 KO. **C** GTRD transcription factor targets MSigDB KEGG pathway in Dicer1 KO.

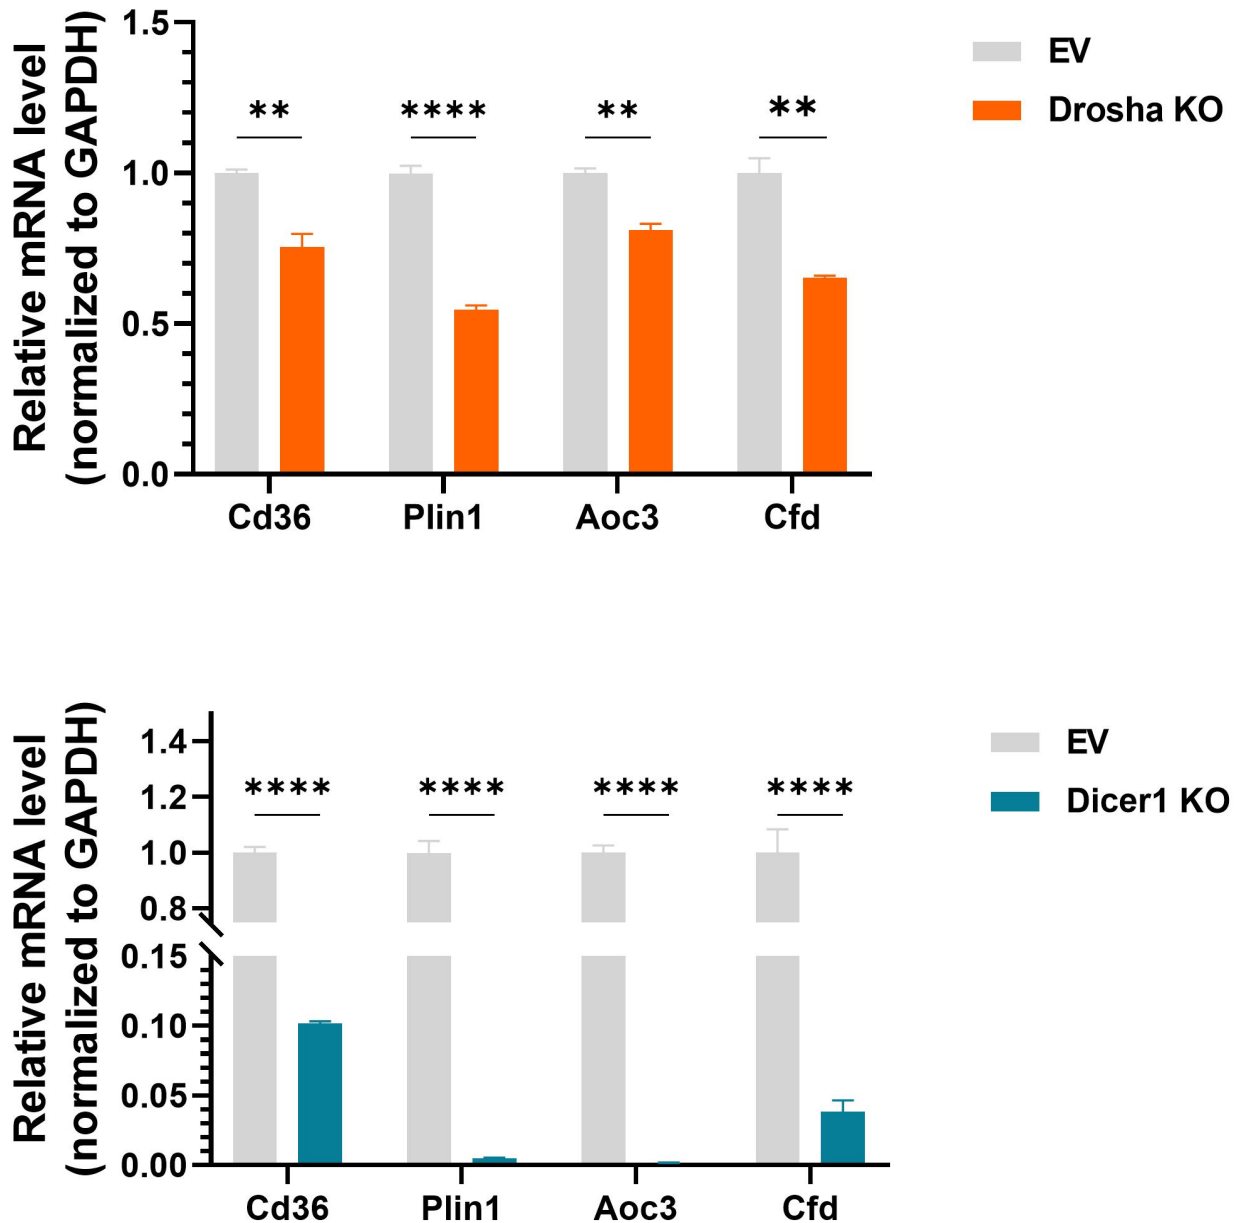

**Supplementary Figure 2. qPCR verified the genes that were enriched with the most significant differences in PPAR pathways.** Results were plotted as Mean  $\pm$  SEM;  $n = 3$  independent experiments.  $p$  values were generated by unpaired Student's  $t$  test. ( \*\* $p < 0.01$ , \*\*\*\* $p < 0.0001$ .)

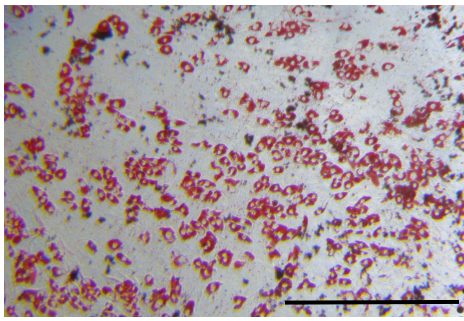

Ctrl

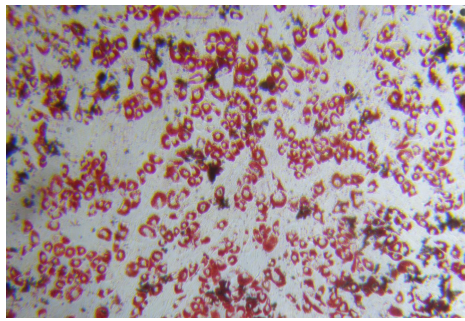

hsa-miR204-5p

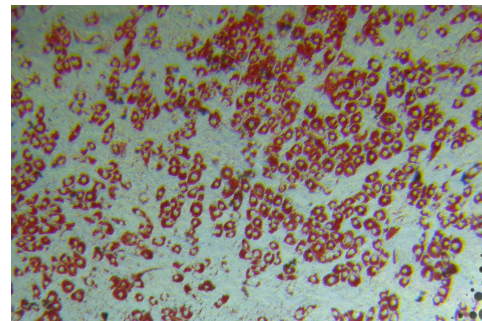

hsa-miR15b-5p

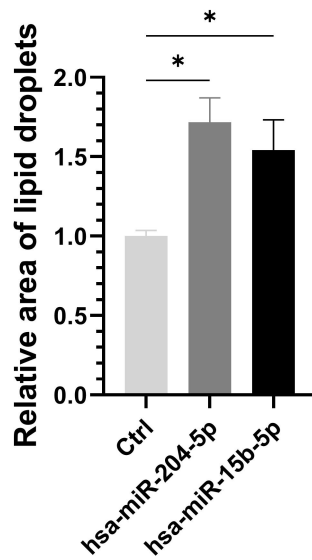

**Supplementary Figure 3. The adipogenic ability was upregulated after transfection with mimics.** Results were plotted as Mean  $\pm$  SEM; n = 3 independent experiments. *p* values were generated by unpaired Student's *t* test. ( \**p* < 0.05) (Scale bars, 50  $\mu$ m.)

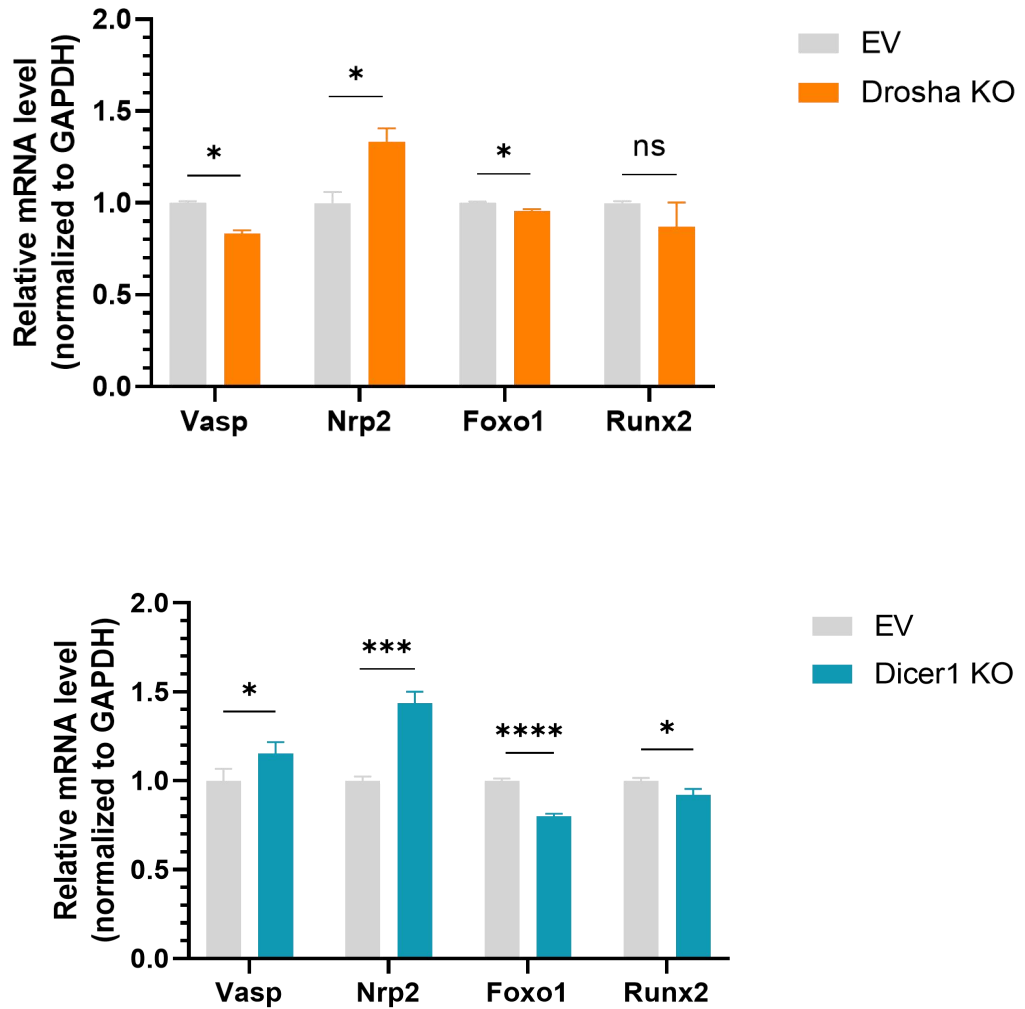

**Supplementary Figure 4. qPCR analysis of established target genes of miR-204 or miR-15b.** Results were plotted as Mean  $\pm$  SEM;  $n = 3$  independent experiments.  $p$  values were generated by unpaired Student's  $t$  test. ( \* $p < 0.05$ , \*\*\* $p < 0.001$ . )
